# Supplementary material for: Targeted Ablation of miR-21 Decreases Murine Eosinophil Progenitor Cell Growth
Source: PubMed Central journal article supplement (PMC3606295; doi:10.1371/journal.pone.0059397), 2013-03-22

Figure S1

Day 8

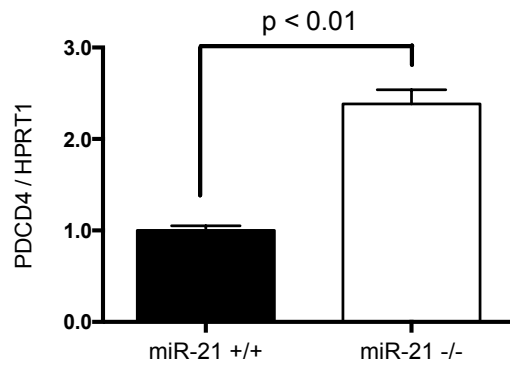

Day 12

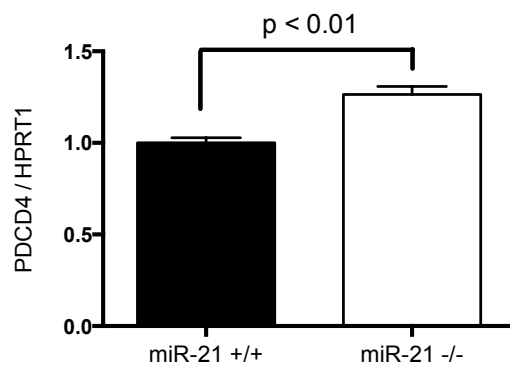

Supplement: pone.0059397.s001.pdf [file pone.0059397.s001.pdf]
