# Supplementary material for: Targeted Ablation of miR-21 Decreases Murine Eosinophil Progenitor Cell Growth
Source: PubMed Central journal article supplement (PMC3606295; doi:10.1371/journal.pone.0059397), 2013-03-22
Supplement: pone.0059397.s004.pdf [file pone.0059397.s004.pdf]

Table S2

| Transcript ID | Gene Symbol                                                                       | Gene Description                                                                                                                           | Fold Change | Regulation     |
|---------------|-----------------------------------------------------------------------------------|--------------------------------------------------------------------------------------------------------------------------------------------|-------------|----------------|
| 10354732      | <i>Hspd1</i>                                                                      | heat shock protein 1 (chaperonin)                                                                                                          | 1.54        | Up-regulated   |
| 10364093      | <i>Derl3</i>                                                                      | Der1-like domain family, member 3                                                                                                          | 1.53        | Up-regulated   |
| 10377286      | <i>Pik3r6</i>                                                                     | phosphoinositide-3-kinase, regulatory subunit 6                                                                                            | 1.67        | Up-regulated   |
| 10384398      | <i>Grb10</i>                                                                      | growth factor receptor bound protein 10                                                                                                    | 1.76        | Up-regulated   |
| 10425287      | <i>Kdelr3</i>                                                                     | KDEL (Lys-Asp-Glu-Leu) endoplasmic reticulum protein retention receptor 3                                                                  | 1.53        | Up-regulated   |
| 10466224      | <i>Ms4a3</i>                                                                      | membrane-spanning 4-domains, subfamily A, member 3                                                                                         | 1.88        | Up-regulated   |
| 10489343      | <i>Ptpla</i>                                                                      | protein tyrosine phosphatase-like (proline instead of catalytic arginine), member a                                                        | 1.53        | Up-regulated   |
| 10495316      | <i>Psrc1</i>                                                                      | proline/serine-rich coiled-coil 1                                                                                                          | 1.51        | Up-regulated   |
| 10527323      | <i>Bhlha15</i>                                                                    | basic helix-loop-helix family, member a15                                                                                                  | 1.57        | Up-regulated   |
| 10542857      | <i>Far2</i>                                                                       | fatty acyl CoA reductase 2                                                                                                                 | 1.52        | Up-regulated   |
| 10548105      | <i>Ccnd2</i>                                                                      | cyclin D2                                                                                                                                  | 1.51        | Up-regulated   |
| 10559818      | N/A                                                                               | N/A                                                                                                                                        | 1.50        | Up-regulated   |
| 10565570      | <i>4632434</i><br><i>I11Rik</i>                                                   | RIKEN cDNA 4632434I11 gene                                                                                                                 | 1.66        | Up-regulated   |
| 10574572      | <i>2210023</i><br><i>G05Rik</i>                                                   | RIKEN cDNA 2210023G05 gene                                                                                                                 | 1.58        | Up-regulated   |
| 10589413      | <i>Nme6/L</i><br><i>OC1000</i><br><i>46163/L</i><br><i>OC1000</i><br><i>46157</i> | non-metastatic cells 6, protein expressed in (nucleoside-diphosphate kinase)   similar to Nme6 protein   hypothetical protein LOC100046157 | 1.52        | Up-regulated   |
| 10345752      | <i>Il1r2</i>                                                                      | interleukin 1 receptor, type II                                                                                                            | -2.16       | Down-regulated |
| 10368343      | <i>Arg1</i>                                                                       | arginase, liver                                                                                                                            | -4.84       | Down-regulated |
| 10374248      | <i>Abca13</i>                                                                     | ATP-binding cassette, sub-family A (ABC1), member 13                                                                                       | -1.90       | Down-regulated |
| 10377782      | <i>Clec10a</i>                                                                    | C-type lectin domain family 10, member A                                                                                                   | -2.69       | Down-regulated |
| 10378816      | <i>Slc6a4</i>                                                                     | solute carrier family 6 (neurotransmitter transporter,                                                                                     | -3.98       | Down-regulated |

|          |                                 |                                                    |       |                |
|----------|---------------------------------|----------------------------------------------------|-------|----------------|
|          |                                 | serotonin), member 4                               |       |                |
| 10379630 | <i>Slfn2</i>                    | schlafen 2                                         | -2.06 | Down-regulated |
| 10379710 | <i>E230016</i><br><i>K23Rik</i> | RIKEN cDNA E230016K23 gene                         | -1.64 | Down-regulated |
| 10380566 | <i>Phospho</i><br><i>1 Abi3</i> | phosphatase, orphan 1   ABI gene family, member 3  | -1.59 | Down-regulated |
| 10380927 | <i>Grb7</i>                     | growth factor receptor bound protein 7             | -1.56 | Down-regulated |
| 10436095 | <i>Retnla</i>                   | resistin like alpha                                | -2.99 | Down-regulated |
| 10467979 | <i>Scd1</i>                     | stearoyl-Coenzyme A desaturase 1                   | -2.00 | Down-regulated |
| 10483228 | <i>Scn3a</i>                    | sodium channel, voltage-gated, type III, alpha     | -1.55 | Down-regulated |
| 10491313 | <i>Cldn11</i>                   | claudin 11                                         | -1.62 | Down-regulated |
| 10570291 | <i>F10</i>                      | coagulation factor X                               | -2.01 | Down-regulated |
| 10585068 | <i>Fam55d</i>                   | family with sequence similarity 55, member D       | -1.51 | Down-regulated |
| 10588691 | <i>Hyal1 N</i><br><i>at6</i>    | hyaluronoglucosaminidase 1   N-acetyltransferase 6 | -1.50 | Down-regulated |
| 10598010 | <i>Ccr1l1</i>                   | chemokine (C-C motif) receptor 1-like 1            | -1.55 | Down-regulated |
